# Supplementary material for: Kinetics and equilibrium studies on the reaction of vitamin B12a with azolesElectronic supplementary information (ESI) available: plot of kobs versus [pyrazole] as a function of temperature. See http://www.rsc.org/suppdata/dt/b2/b202877h/
Source: Royal Society of Chemistry journal article supplement (doi:10.1039/b202877h), 2002-06-24

## Supporting Information

Fig S-1: Plot of  $k_{\text{obs}}$  versus [pyrazole] for the reaction between  $\text{H}_2\text{OcbI}^+$  and pyrazole as a function of temperature. Experimental conditions:  $[\text{H}_2\text{OcbI}^+] = 4 \times 10^{-5} \text{ M}$ , pH 6,  $I = 0.1 \text{ M}$  ( $\text{NaClO}_4$ ) and temperature = 5.0 (A); 15.0 (B); 25.0 (C) and 35.0 °C (D).

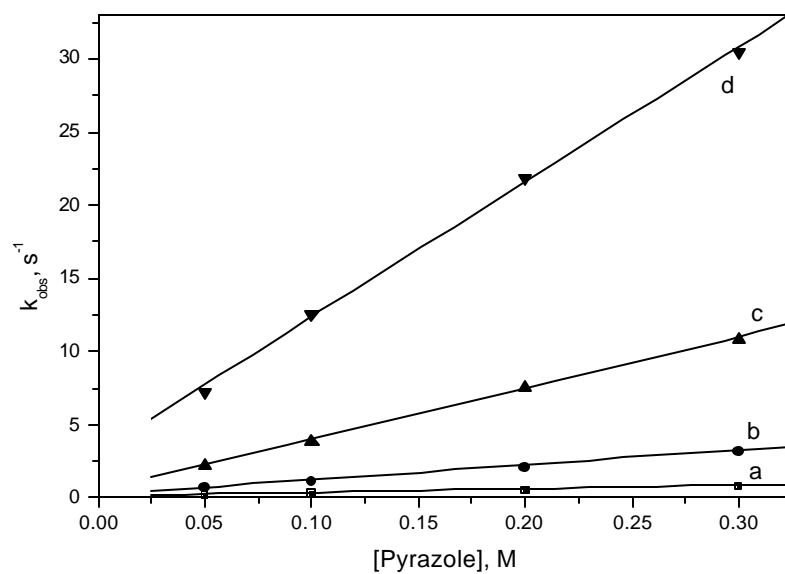

Supplement: b202877h.pdf [file b202877h.pdf]
